# Supplementary material for: Highly effective ashless and non-corrosive dimercaptobenzothiadiazole as multifunctional lubricant additives in naphthenic base oil
Source: Royal Society of Chemistry journal article supplement (doi:10.1039/d3ra05692a), 2023-01-01
Supplement: d3ra05692a1.pdf [file d3ra05692a1.pdf]

## Supplementary Data

### List of Figure

**Fig. S1.** The (a)  $^1\text{H}$  NMR, (b)  $^{13}\text{C}$  NMR and (c) GCMS spectral data of BBST.

**Fig. S2.** The (a)  $^1\text{H}$  NMR, (b)  $^{13}\text{C}$  NMR and (c) GCMS spectral data of BOST.

**Fig. S3.** Samples photo: (a) NBO, (b) NBO + 10 wt% BBST, and (c) NBO + 10 wt% BOST.

**Fig. S4.** Average dynamic viscosity as a function of temperature for NBO, 10 wt% BBST and 10 wt% BOST.

**Fig. S5.** Elemental composition of the wear scars on the test cylindrical with (a) NBO, and 10 wt% (b) BBST, (c) BOST, (d) MCCP, and (e) ZDDP in NBO.

**Fig. S6.** MEPS of (a) BBST and (b) BOST.

**Fig. S7.** XPS of the wear scars lubricated with NBO alone.

**BBST. White solid.** 90% Isolated yields. mp 83-85 °C.  $^1\text{H}$  NMR (600 MHz,  $\text{CDCl}_3$ ):  $\delta$  7.40 (d,  $J = 7.3$  Hz, 4H), 7.33 (t,  $J = 7.2$  Hz, 4H), 7.29 (t,  $J = 7.2$  Hz, 4H), 4.50 (s, 4H) ppm.  $^{13}\text{C}$  NMR (600 MHz,  $\text{CDCl}_3$ ):  $\delta$  164.93, 135.92, 129.34, 128.92, 128.10, 38.61 ppm. MS (EI, 70 eV)  $m/z$  330.

**Fig. S1.** The (a)  $^1\text{H}$  NMR, (b)  $^{13}\text{C}$  NMR and (c) GCMS spectral data of BBST.

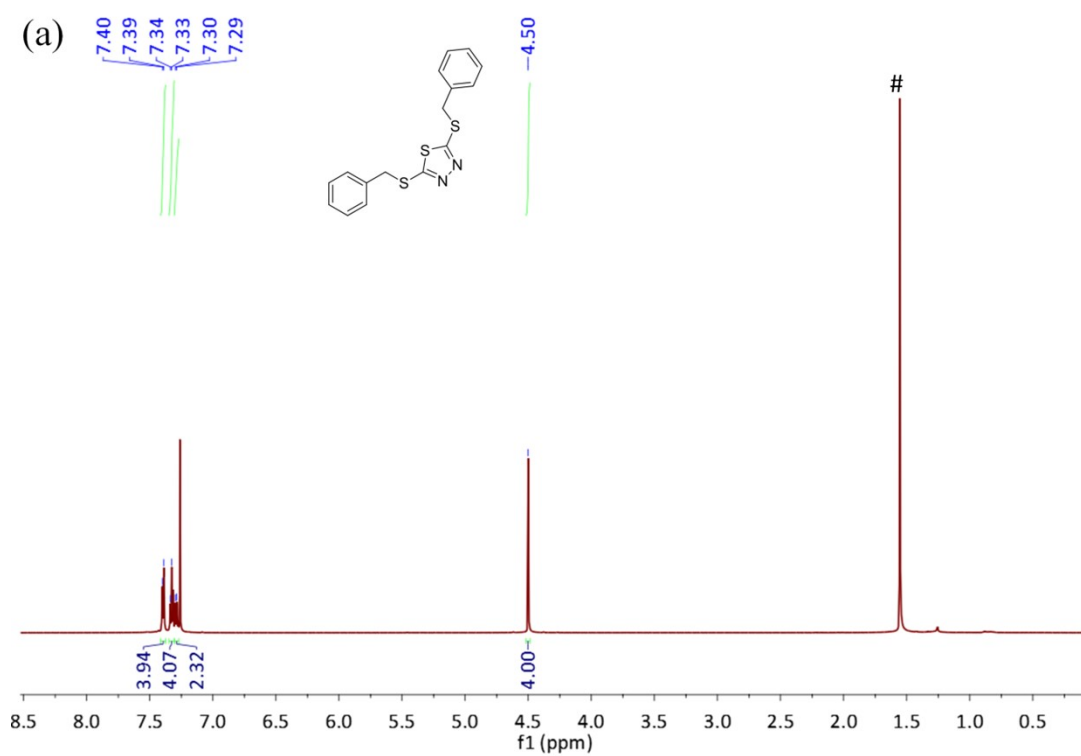

The resonance marked with # is originating from water.

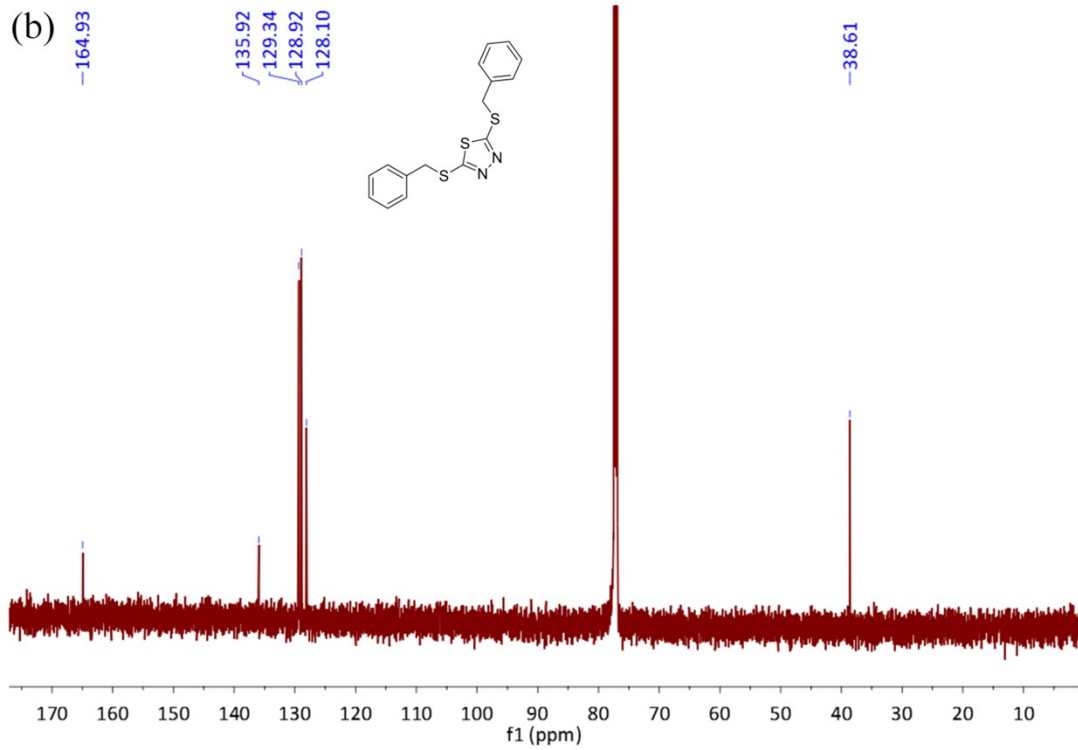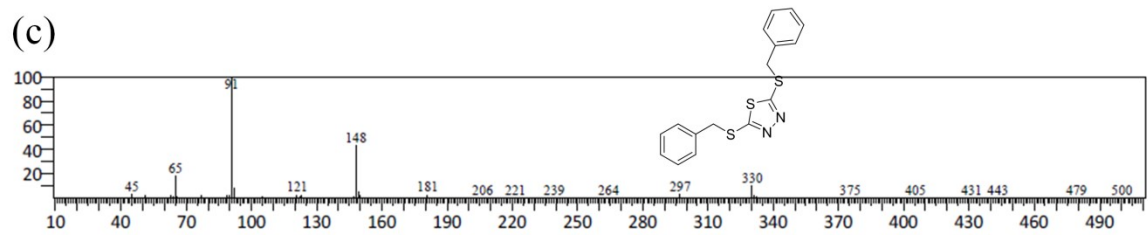

**BOST. Transparent liquid.** 97 % Isolated yields.  $^1\text{H NMR}$  (600 MHz,  $\text{CDCl}_3$ ):  $\delta$  3.26 (t,  $J = 7.4$  Hz, 2H), 1.78 (quint,  $J = 7.5$  Hz, 4H), 1.45 - 1.26 (m, 10H), 0.87 (dd,  $J = 7.1$  and 6.8 Hz, 3H) ppm.  $^{13}\text{C NMR}$  (600 MHz,  $\text{CDCl}_3$ ):  $\delta$  165.41, 34.52, 31.90, 29.35, 29.26, 29.16, 28.85, 22.76, 14.21 ppm. **MS (EI):**  $m/z$  calcd for  $\text{C}_{18}\text{H}_{34}\text{N}_2\text{S}_3\text{Na}^+$  [ $\text{M}+\text{Na}$ ] $^+$ : 397.1777; found: 397.1655;  $m/z$  calcd for  $\text{C}_{36}\text{H}_{68}\text{N}_4\text{S}_6\text{Na}^+$  [ $2\text{M}+\text{Na}$ ] $^+$ : 771.3661 ; found: 771.3575.

**Fig. S2.** The (a)  $^1\text{H NMR}$ , (b)  $^{13}\text{C NMR}$  and (c) GCMS spectral data of BOST.

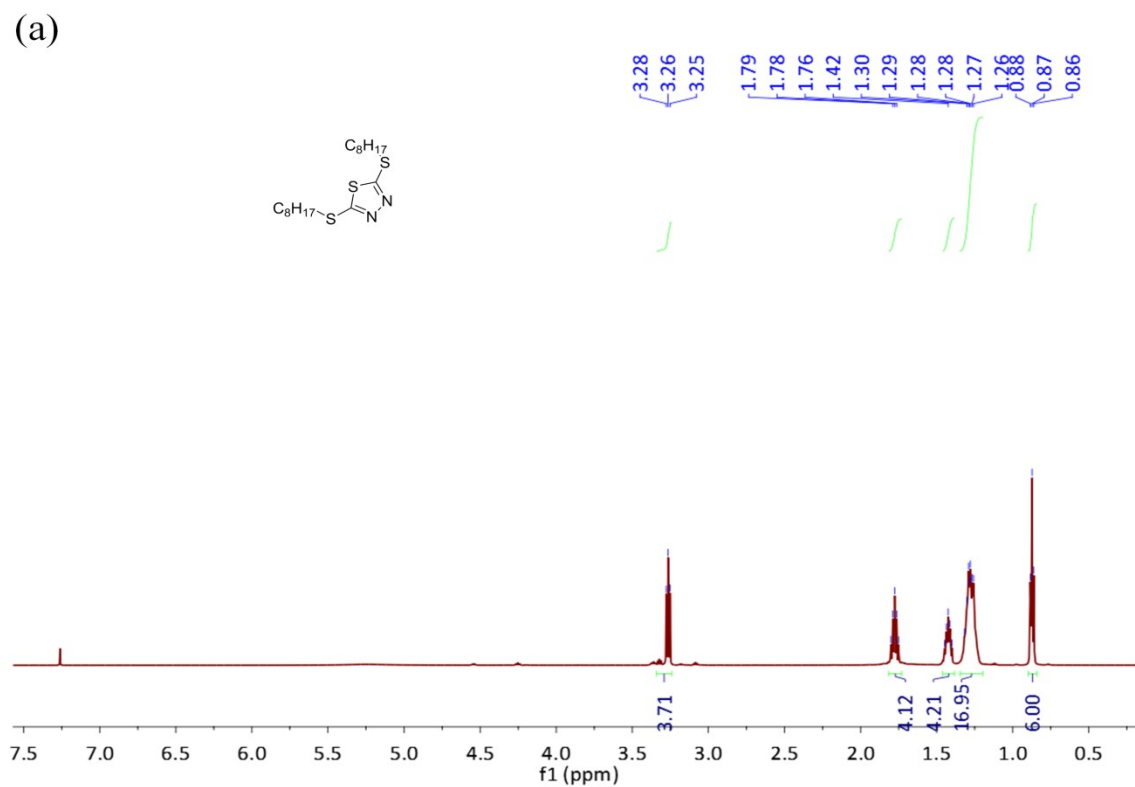

(b)

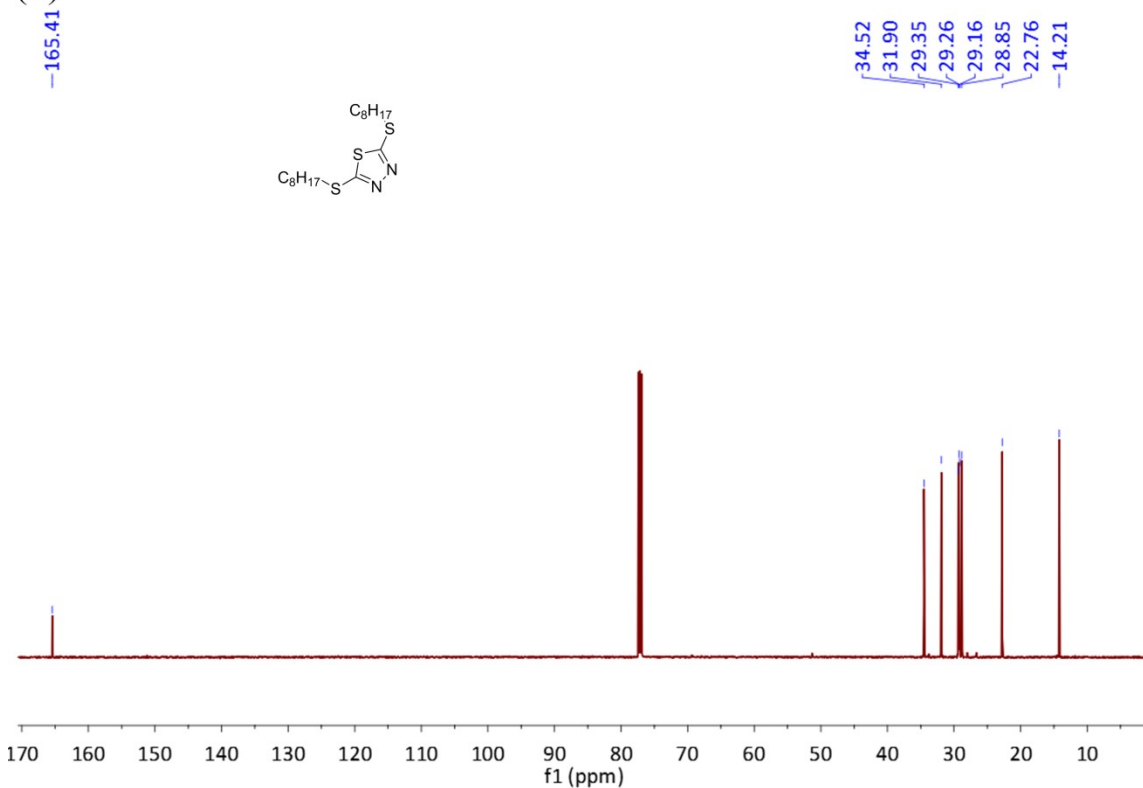

(c)

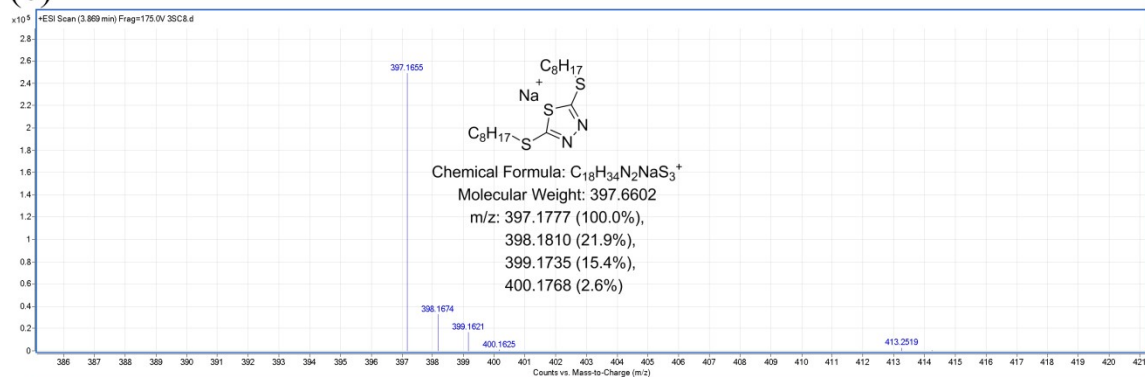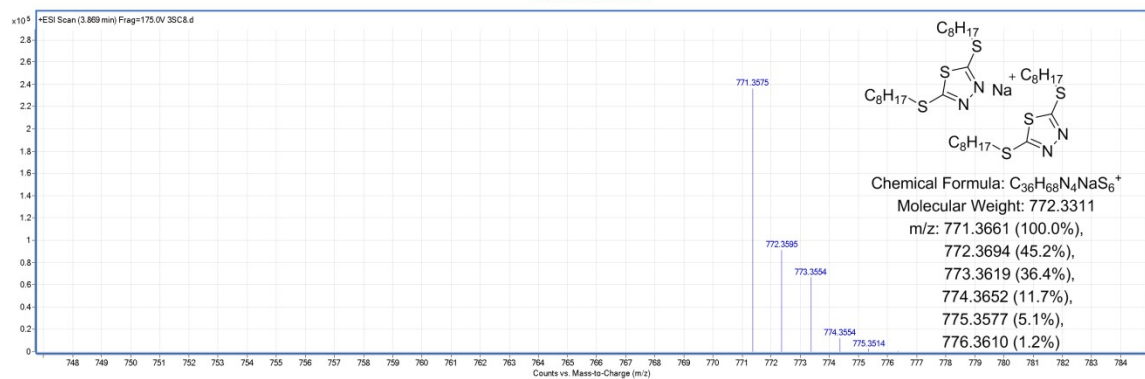

**Fig. S3.** Samples photo: (a) NBO, (b) NBO + 10 wt% BBST, and (c) NBO + 10 wt% BOST.

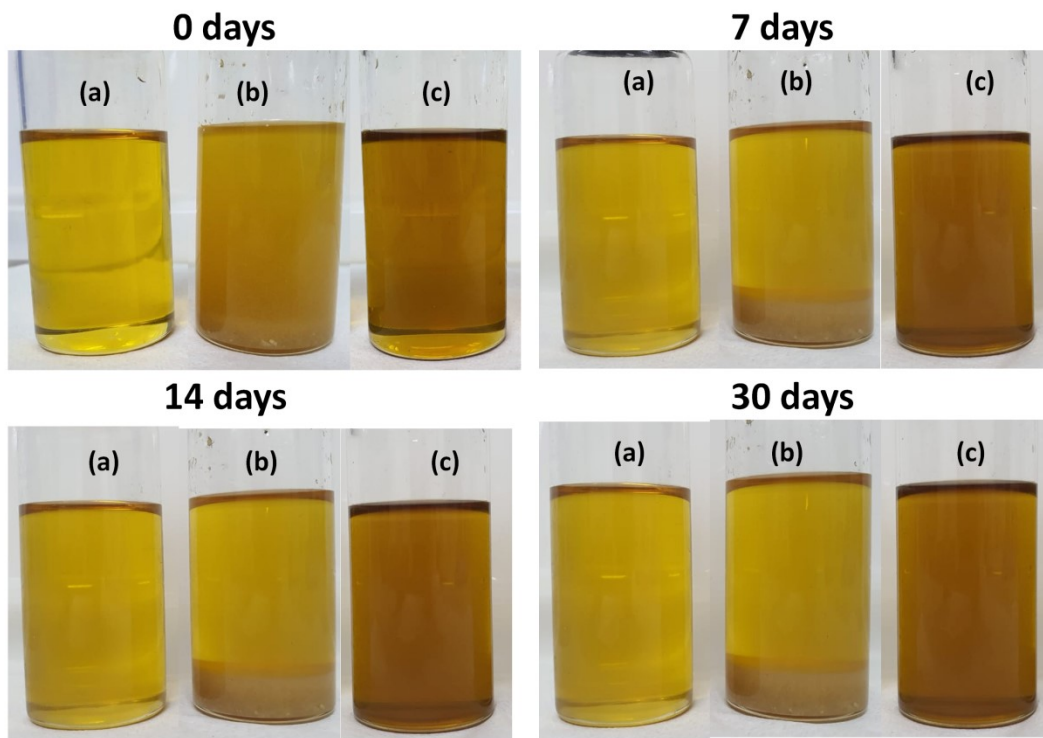

**Fig. S4.** Average dynamic viscosity as a function of temperature for NBO, 10 wt% BBST and 10 wt% BOST.

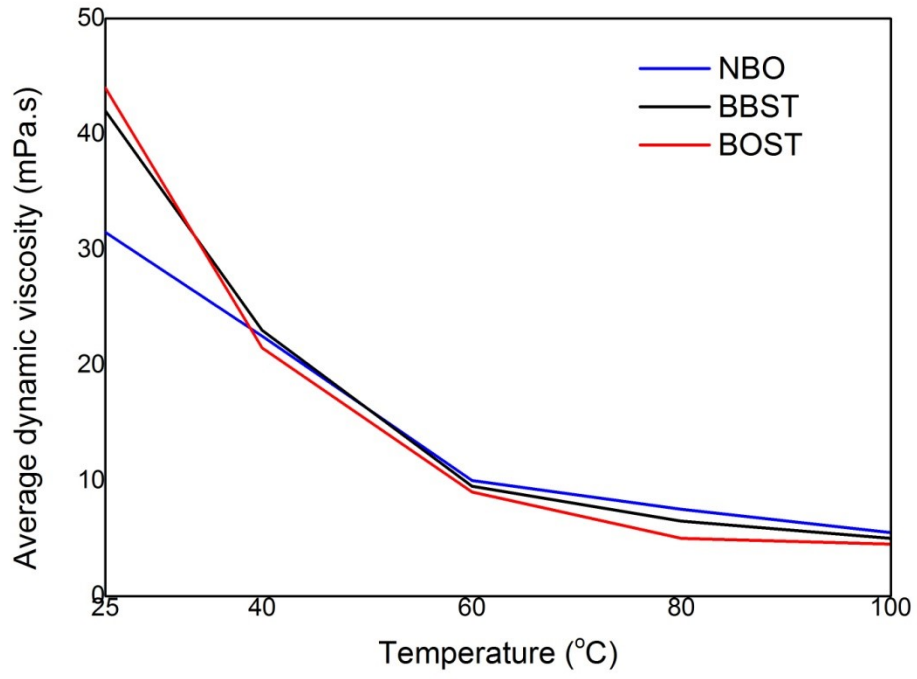

**Fig. S5.** Elemental composition of the wear scars on the test cylindrical with (a) NBO, and 10 wt% (b) BBST, (c) BOST, (d) MCCP, and (e) ZDDP in NBO.

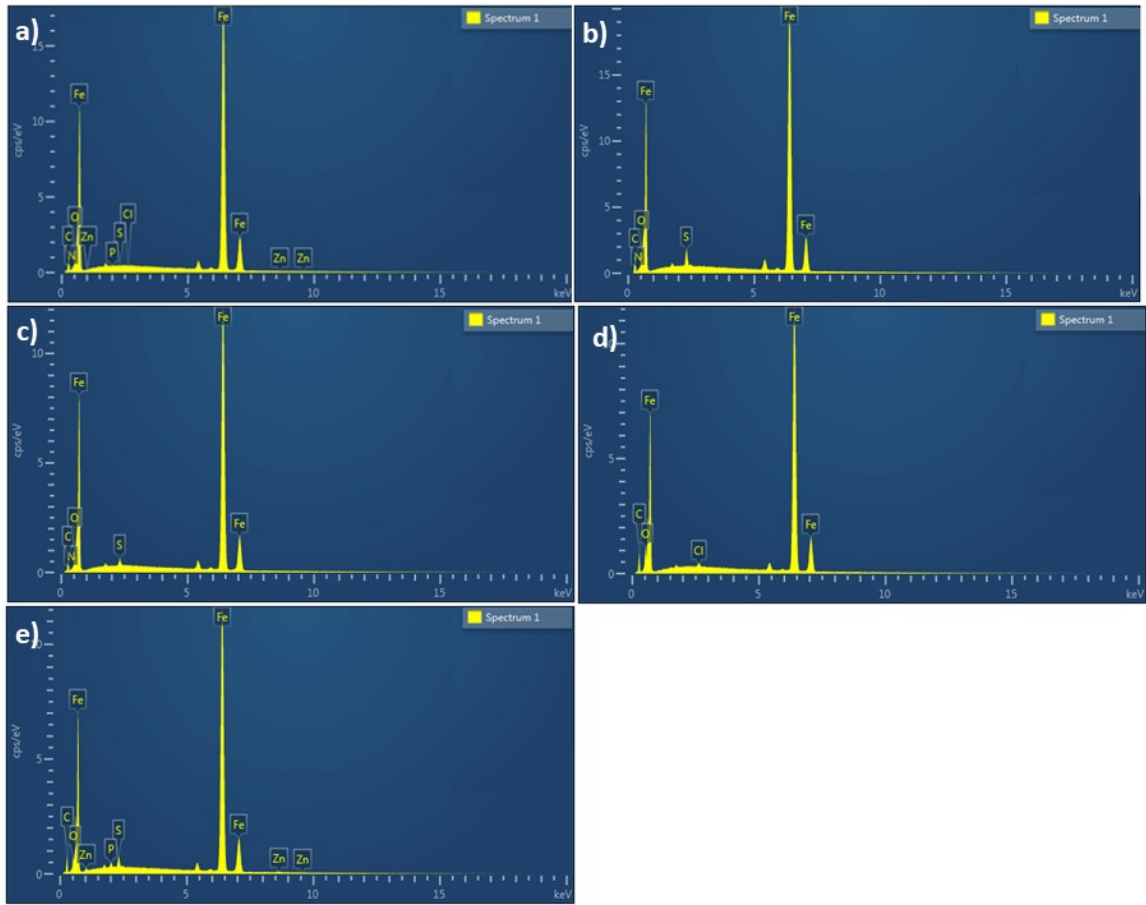



**Fig. S6.** MEPS of (a) BBST and (b) BOST.

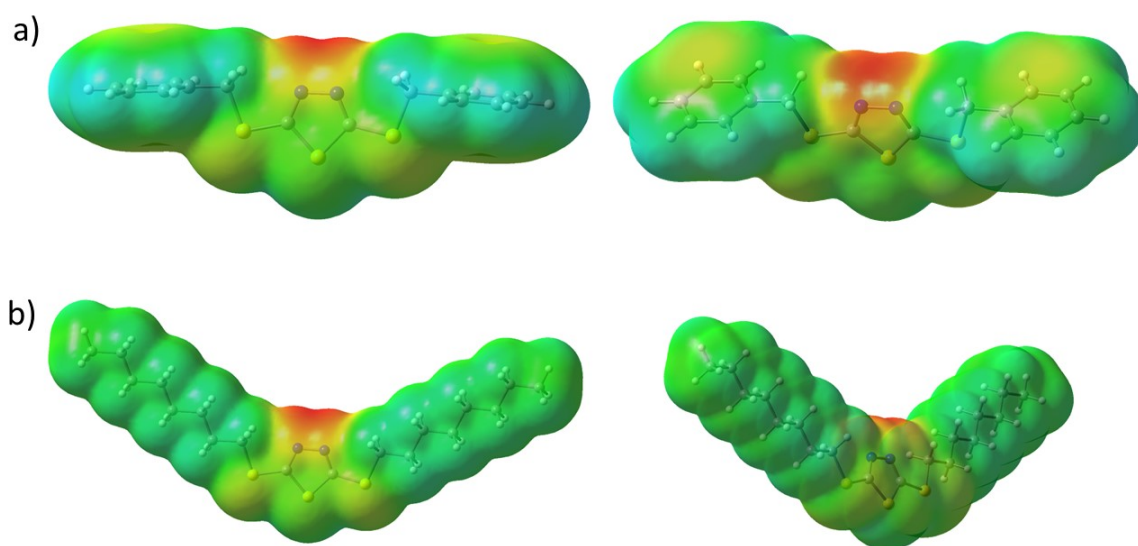

**Fig. S7.** XPS of the wear scars lubricated with NBO alone.

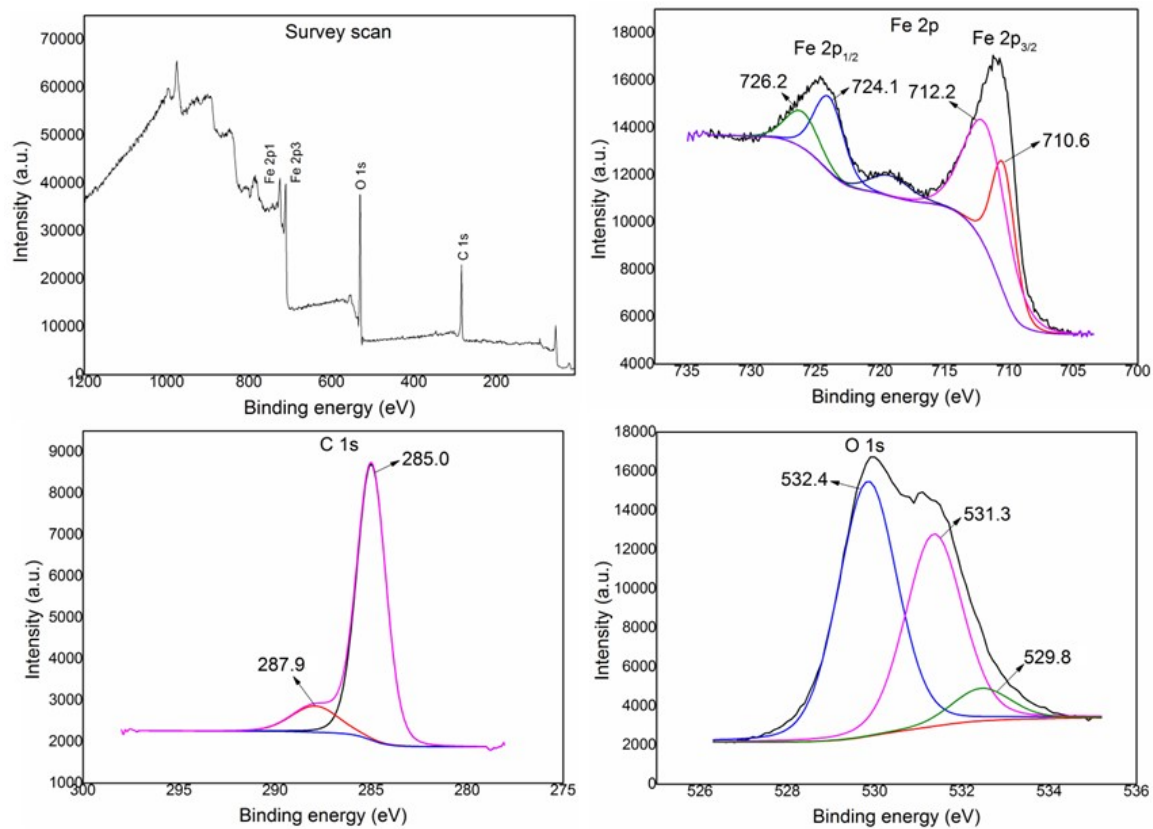

## List of Table

**Table S1** Chemicals composition on the worn surfaces.

| Sample | XPS analysis       |                   |                                |                   |      |        |
|--------|--------------------|-------------------|--------------------------------|-------------------|------|--------|
|        | Narrow scan (at %) |                   |                                |                   |      |        |
|        | S 2p               |                   | O 1s                           |                   | N 1s |        |
|        | FeS                | FeSO <sub>4</sub> | Fe <sub>2</sub> O <sub>3</sub> | FeSO <sub>4</sub> | C=N  | Fe···N |
| BBST   | 87.9               | 12.1              | 38.2                           | 61.8              | 21.1 | 78.9   |
| BOST   | 70.4               | 29.6              | 32.7                           | 67.3              | 11.1 | 88.9   |
